# Supplementary material
Source: PubMed Central journal article supplement (PMC3097167)

**a** Supp. Fig. 1A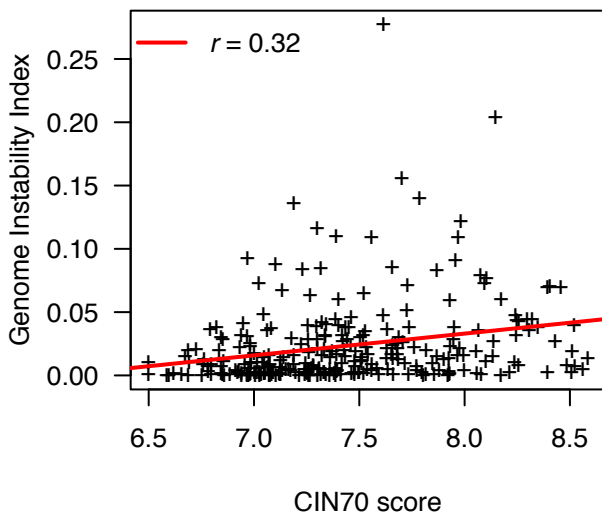**b** Supp. Fig. 1B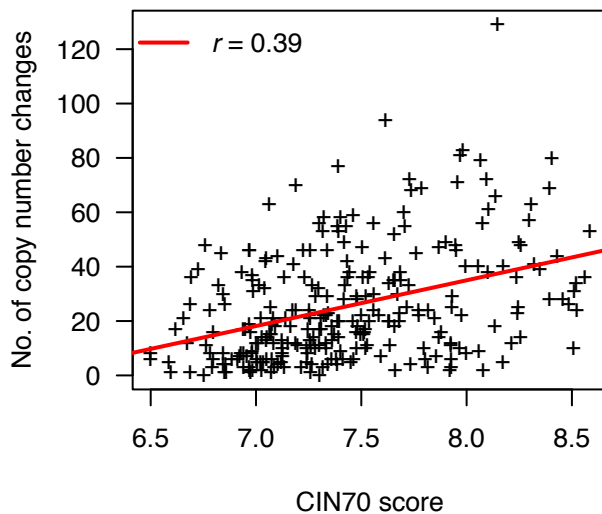**c** Supp. Fig. 1C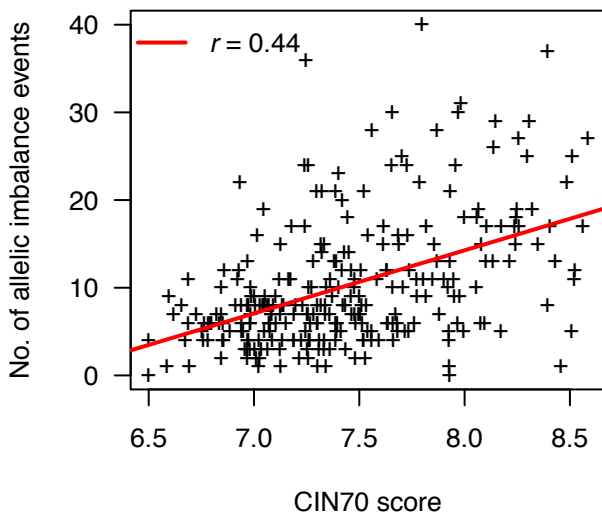**d** Supp. Fig. 1D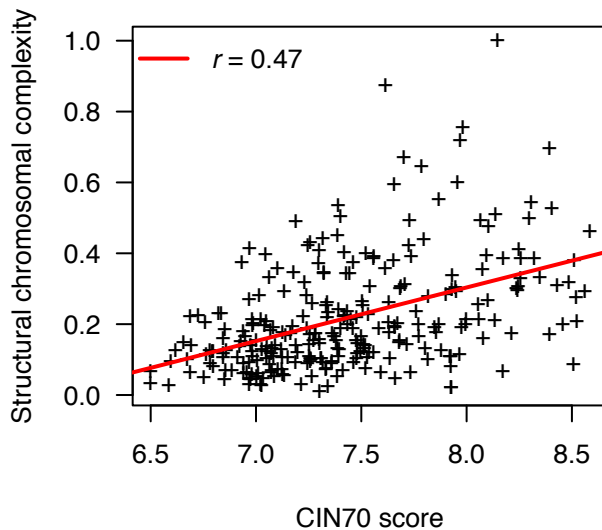

Supplement: NIHMS34212-supplement-1.pdf [file NIHMS34212-supplement-1.pdf]

### Supp. Fig. 3

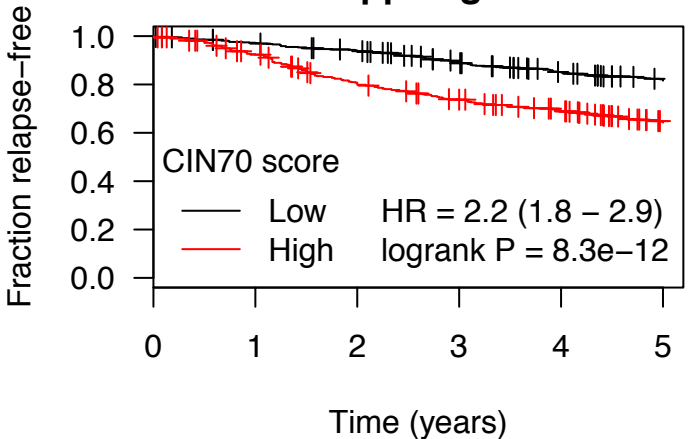

number at risk

|     |     |     |     |     |     |
|-----|-----|-----|-----|-----|-----|
| 587 | 562 | 538 | 498 | 461 | 421 |
| 581 | 525 | 451 | 404 | 367 | 305 |

Supplement: NIHMS34212-supplement-4.pdf [file NIHMS34212-supplement-4.pdf]

## Supp. Fig. 4

Study Reference

GSE2034  
Chin et al.  
GSE2990  
GSE2603  
GSE1456  
GSE7390  
GSE5460

Summary

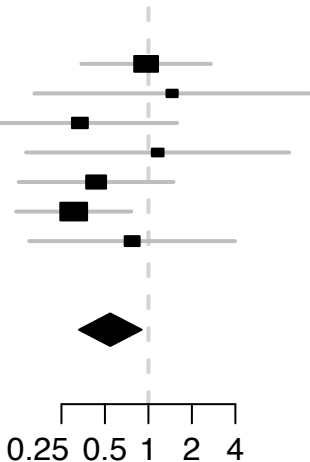

Hazard Ratio

Supplement: NIHMS34212-supplement-5.pdf [file NIHMS34212-supplement-5.pdf]

**a****Supp. figure 6a**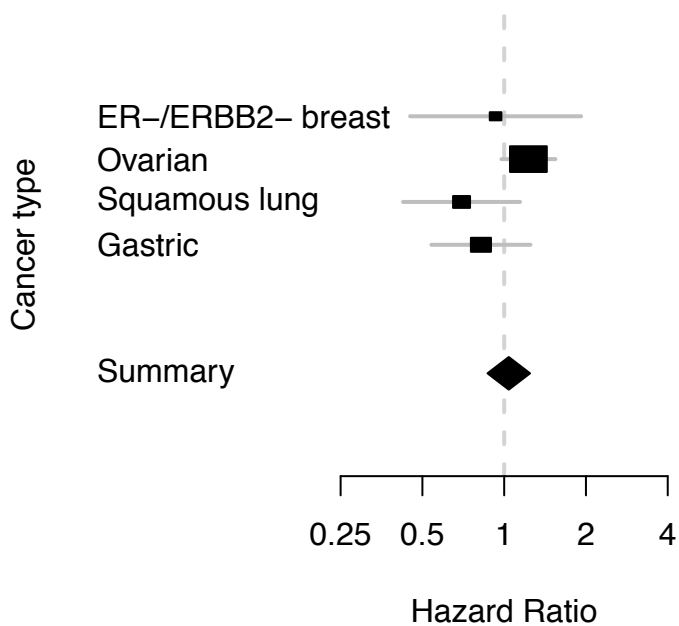**b****Supp. figure 6b**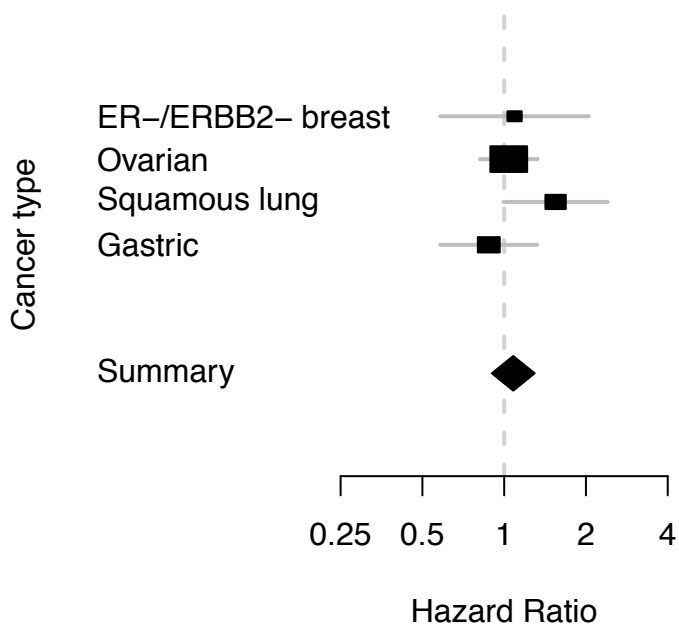**c****Supp. figure 6c**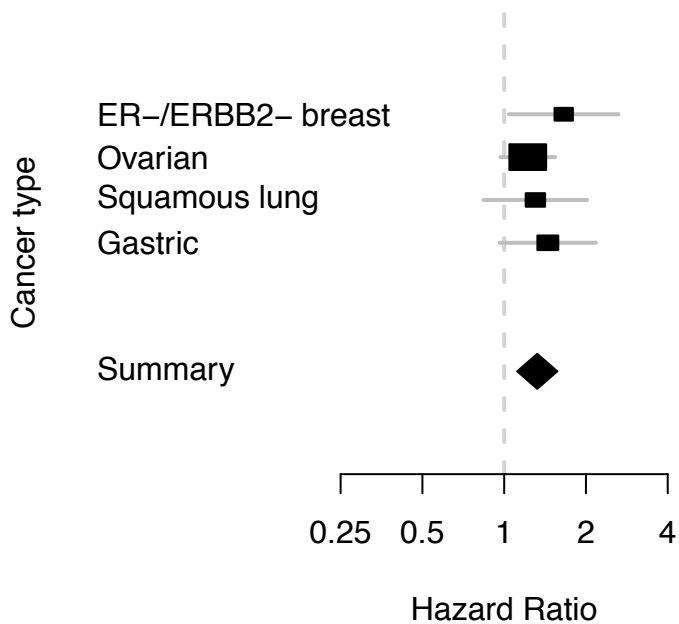**d****Supp. figure 6d**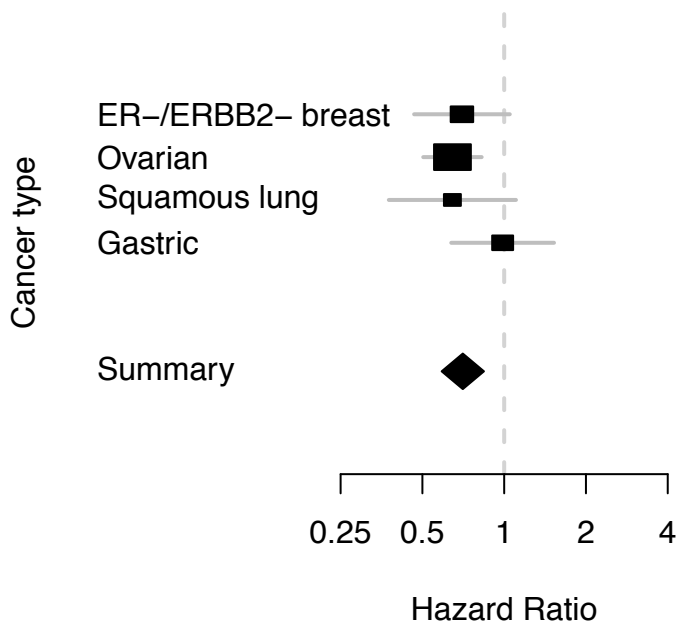

Supplement: NIHMS34212-supplement-7.pdf [file NIHMS34212-supplement-7.pdf]
